# Supplementary material
Source: PubMed Central journal article supplement (PMC3627389)
Supplement: NIHMS453902-supplement-Supplementary_Figure_1.pdf [file NIHMS453902-supplement-Supplementary_Figure_1.pdf]

# Supplementary Figure 1

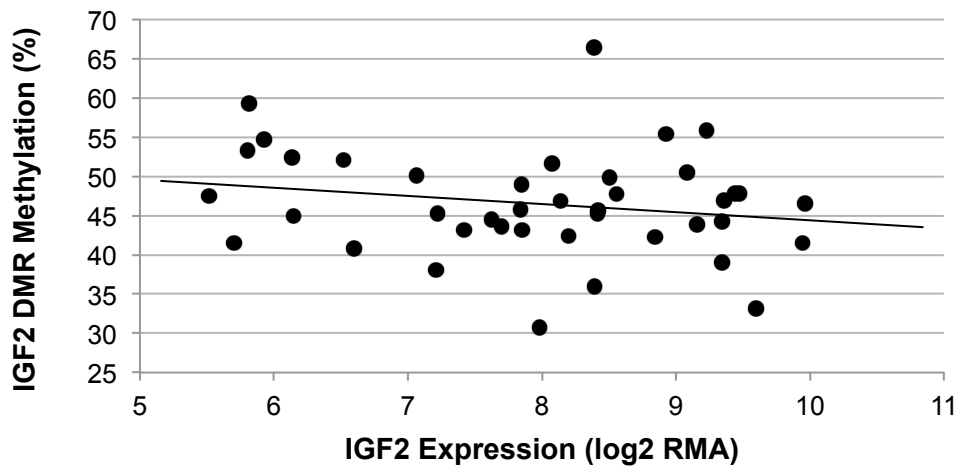

Relationship between *IGF2* expression from Affymetrix U133 HTA microarray analysis, as  $\log_2$ -transformed RMA normalized values, and *IGF2* DMR methylation measured by pyrosequencing ( $\rho = -0.20$ ).
